# Supplementary material
Source: HighWire-hosted journal article supplement (https://rapm.bmj.com/highwire/filestream/15512/field_highwire_adjunct_files/4/rapm-2021-102705supp005_data_supplement.pdf)
Supplement: rapm-2021-102705supp005_data_supplement.pdf [file rapm-2021-102705supp005_data_supplement.pdf]

## Appendix E – Evidence Profile for all outcomes assessed.

| Certainty assessment |              |              |               |              |             |                      | № of patients |      | Effect            |                   | Certainty | Importance |
|----------------------|--------------|--------------|---------------|--------------|-------------|----------------------|---------------|------|-------------------|-------------------|-----------|------------|
| № of studies         | Study design | Risk of bias | Inconsistency | Indirectness | Imprecision | Other considerations | iPACK + sACB  | sACB | Relative (95% CI) | Absolute (95% CI) |           |            |

***iPACK + ACB versus ACB in presence of LIA*****Rest pain at 0 hours (PACU) (cm)**

|   |                   |             |             |             |                      |      |     |     |                |                                                     |                  |           |
|---|-------------------|-------------|-------------|-------------|----------------------|------|-----|-----|----------------|-----------------------------------------------------|------------------|-----------|
| 4 | randomised trials | not serious | not serious | not serious | serious <sup>b</sup> | none | 137 | 136 | Not Applicable | MD <b>0.02 lower</b><br>(0.12 lower to 0.07 higher) | ⊕⊕⊕○<br>MODERATE | IMPORTANT |
|---|-------------------|-------------|-------------|-------------|----------------------|------|-----|-----|----------------|-----------------------------------------------------|------------------|-----------|

**Rest pain at 6 hours (cm)**

|   |                   |             |             |             |                      |      |     |     |                |                                                     |                  |          |
|---|-------------------|-------------|-------------|-------------|----------------------|------|-----|-----|----------------|-----------------------------------------------------|------------------|----------|
| 4 | randomised trials | not serious | not serious | not serious | serious <sup>b</sup> | none | 137 | 136 | Not Applicable | MD <b>0.41 lower</b><br>(0.84 lower to 0.02 higher) | ⊕⊕⊕○<br>MODERATE | CRITICAL |
|---|-------------------|-------------|-------------|-------------|----------------------|------|-----|-----|----------------|-----------------------------------------------------|------------------|----------|

**Rest pain at 12 hours (cm)**

|   |                   |             |             |             |                      |      |     |     |                |                                                     |                  |           |
|---|-------------------|-------------|-------------|-------------|----------------------|------|-----|-----|----------------|-----------------------------------------------------|------------------|-----------|
| 4 | randomised trials | not serious | not serious | not serious | serious <sup>b</sup> | none | 137 | 136 | Not Applicable | MD <b>0.41 lower</b><br>(0.90 lower to 0.08 higher) | ⊕⊕⊕○<br>MODERATE | IMPORTANT |
|---|-------------------|-------------|-------------|-------------|----------------------|------|-----|-----|----------------|-----------------------------------------------------|------------------|-----------|

**Rest pain at 24 hours (cm)**

|   |                   |             |             |             |             |      |     |     |                |                                                     |              |           |
|---|-------------------|-------------|-------------|-------------|-------------|------|-----|-----|----------------|-----------------------------------------------------|--------------|-----------|
| 4 | randomised trials | not serious | not serious | not serious | not serious | none | 137 | 136 | Not Applicable | MD <b>0.19 lower</b><br>(0.52 lower to 0.13 higher) | ⊕⊕⊕⊕<br>HIGH | IMPORTANT |
|---|-------------------|-------------|-------------|-------------|-------------|------|-----|-----|----------------|-----------------------------------------------------|--------------|-----------|

**Post-operative function**

|   |                   |             |                      |             |                      |      |     |     |                |                                                          |             |           |
|---|-------------------|-------------|----------------------|-------------|----------------------|------|-----|-----|----------------|----------------------------------------------------------|-------------|-----------|
| 3 | randomised trials | not serious | serious <sup>a</sup> | not serious | serious <sup>b</sup> | none | 129 | 128 | Not Applicable | Log(OR) <b>0.90 lower</b><br>(2.65 lower to 0.84 higher) | ⊕⊕○○<br>LOW | IMPORTANT |
|---|-------------------|-------------|----------------------|-------------|----------------------|------|-----|-----|----------------|----------------------------------------------------------|-------------|-----------|

**Morphine consumption at 24 hours (mg)**

|   |                   |             |                      |             |                      |      |     |     |                |                                                     |             |           |
|---|-------------------|-------------|----------------------|-------------|----------------------|------|-----|-----|----------------|-----------------------------------------------------|-------------|-----------|
| 4 | randomised trials | not serious | serious <sup>a</sup> | not serious | serious <sup>b</sup> | none | 137 | 136 | Not Applicable | MD <b>4.17 lower</b><br>(9.85 lower to 1.51 higher) | ⊕⊕○○<br>LOW | IMPORTANT |
|---|-------------------|-------------|----------------------|-------------|----------------------|------|-----|-----|----------------|-----------------------------------------------------|-------------|-----------|

***iPACK + ACB versus ACB in absence of LIA*****Rest pain at 0 hours (PACU) (cm)**

|   |                   |             |                      |             |                      |      |     |     |                |                                                     |             |           |
|---|-------------------|-------------|----------------------|-------------|----------------------|------|-----|-----|----------------|-----------------------------------------------------|-------------|-----------|
| 5 | randomized trials | not serious | serious <sup>a</sup> | not serious | serious <sup>b</sup> | none | 173 | 172 | Not Applicable | MD <b>0.87 lower</b><br>(1.76 lower to 0.02 higher) | ⊕⊕○○<br>LOW | IMPORTANT |
|---|-------------------|-------------|----------------------|-------------|----------------------|------|-----|-----|----------------|-----------------------------------------------------|-------------|-----------|

## Rest pain at 6 hours (cm)

|   |                   |             |                      |             |             |      |     |     |                |                                             |                  |          |
|---|-------------------|-------------|----------------------|-------------|-------------|------|-----|-----|----------------|---------------------------------------------|------------------|----------|
| 8 | randomized trials | not serious | serious <sup>a</sup> | not serious | not serious | none | 316 | 315 | Not Applicable | MD 1.33 lower<br>(1.58 lower to 1.08 lower) | ⊕⊕⊕○<br>MODERATE | CRITICAL |
|---|-------------------|-------------|----------------------|-------------|-------------|------|-----|-----|----------------|---------------------------------------------|------------------|----------|

## Rest pain at 12 hours (cm)

|   |                   |             |                      |             |             |      |     |     |                |                                             |                  |           |
|---|-------------------|-------------|----------------------|-------------|-------------|------|-----|-----|----------------|---------------------------------------------|------------------|-----------|
| 6 | randomized trials | not serious | serious <sup>a</sup> | not serious | not serious | none | 250 | 249 | Not Applicable | MD 0.98 lower<br>(1.79 lower to 0.17 lower) | ⊕⊕⊕○<br>MODERATE | IMPORTANT |
|---|-------------------|-------------|----------------------|-------------|-------------|------|-----|-----|----------------|---------------------------------------------|------------------|-----------|

## Rest pain at 24 hours (cm)

|    |                   |             |                      |             |             |      |     |     |                |                                             |                  |           |
|----|-------------------|-------------|----------------------|-------------|-------------|------|-----|-----|----------------|---------------------------------------------|------------------|-----------|
| 10 | randomized trials | not serious | serious <sup>a</sup> | not serious | not serious | none | 234 | 234 | Not Applicable | MD 0.69 lower<br>(1.18 lower to 0.20 lower) | ⊕⊕⊕○<br>MODERATE | IMPORTANT |
|----|-------------------|-------------|----------------------|-------------|-------------|------|-----|-----|----------------|---------------------------------------------|------------------|-----------|

## Morphine consumption at 24 hours (mg)

|   |                   |             |             |             |                      |      |     |     |                |                                               |                  |           |
|---|-------------------|-------------|-------------|-------------|----------------------|------|-----|-----|----------------|-----------------------------------------------|------------------|-----------|
| 3 | randomized trials | not serious | not serious | not serious | serious <sup>b</sup> | none | 124 | 122 | Not Applicable | MD 1.21 lower<br>(-9.71 lower to 7.29 higher) | ⊕⊕⊕○<br>MODERATE | IMPORTANT |
|---|-------------------|-------------|-------------|-------------|----------------------|------|-----|-----|----------------|-----------------------------------------------|------------------|-----------|

## Post-operative function

|   |                   |             |                      |             |             |      |     |     |                |                                                     |                  |           |
|---|-------------------|-------------|----------------------|-------------|-------------|------|-----|-----|----------------|-----------------------------------------------------|------------------|-----------|
| 9 | randomized trials | not serious | serious <sup>a</sup> | not serious | not serious | none | 349 | 347 | Not Applicable | Log(OR) 1.88 higher<br>(0.45 higher to 2.11 higher) | ⊕⊕⊕○<br>MODERATE | IMPORTANT |
|---|-------------------|-------------|----------------------|-------------|-------------|------|-----|-----|----------------|-----------------------------------------------------|------------------|-----------|

## Opioid related side effects

|   |                   |             |             |             |             |      |               |                |                           |                                                  |              |          |
|---|-------------------|-------------|-------------|-------------|-------------|------|---------------|----------------|---------------------------|--------------------------------------------------|--------------|----------|
| 6 | randomised trials | not serious | not serious | not serious | not serious | none | 17/200 (8.5%) | 32/198 (16.2%) | OR 0.43<br>(0.26 to 1.02) | 72 fewer per 1,000<br>(from 114 fewer to 3 more) | ⊕⊕⊕⊕<br>HIGH | CRITICAL |
|---|-------------------|-------------|-------------|-------------|-------------|------|---------------|----------------|---------------------------|--------------------------------------------------|--------------|----------|

## Block-related complications

|   |                   |             |             |             |             |      |              |              |                |                |              |          |
|---|-------------------|-------------|-------------|-------------|-------------|------|--------------|--------------|----------------|----------------|--------------|----------|
| 6 | randomised trials | not serious | not serious | not serious | not serious | none | 0/190 (0.0%) | 0/190 (0.0%) | Not applicable | Not Applicable | ⊕⊕⊕⊕<br>HIGH | CRITICAL |
|---|-------------------|-------------|-------------|-------------|-------------|------|--------------|--------------|----------------|----------------|--------------|----------|

CI: Confidence interval; MD: Mean difference; OR: Odds ratio; ACB: adductor canal block; iPACK: infiltration between popliteal artery and posterior capsule of knee; CM: centimeter.

## Explanations

- a. Heterogeneity > 50%.
- b. Lower and upper bound of confidence interval change direction of benefit.
